# Supplementary material
Source: MDPI journal article supplement (https://www.mdpi.com/2218-0532/91/1/10)
Supplement: s1 [file s1]

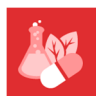

**Table S1.** The data presented in the study – results of furazidin susceptibility testing.

| Sample | Species name                | MIC [μg/mL] |      |      | Inhibition zone diameter [mm] |      |      |
|--------|-----------------------------|-------------|------|------|-------------------------------|------|------|
| No.    | substance:                  | PP          | T1   | T2   | PP                            | T1   | T2   |
| 01     | <i>E. coli</i> (ATCC 25922) | 8           | 4    | 4    | 16.5                          | 16.3 | 15.6 |
| 02     | <i>E. coli</i> (ATCC 8739)  | 8           | 4    | 8    | 17.5                          | 16.7 | 16.9 |
| 03     | <i>E. coli</i>              | 4           | 2    | 2    | 16.5                          | 16.4 | 16.3 |
| 04     | <i>E. coli</i>              | 4           | 2    | 4    | 15.1                          | 15.3 | 15.3 |
| 05     | <i>E. coli</i>              | 2           | 1    | 4    | 16.0                          | 15.9 | 15.0 |
| 06     | <i>E. coli</i>              | 8           | 4    | 4    | 17.9                          | 17.4 | 16.3 |
| 07     | <i>E. coli</i>              | 16          | 4    | 4    | 15.5                          | 15.7 | 14.6 |
| 08     | <i>E. coli</i>              | 8           | 4    | 4    | 16.6                          | 15.9 | 15.0 |
| 09     | <i>E. coli</i>              | 16          | 4    | 4    | 16.9                          | 16.4 | 14.8 |
| 10     | <i>E. coli</i>              | 8           | 8    | 8    | 12.7                          | 12.5 | 11.6 |
| 11     | <i>E. coli</i>              | 8           | 4    | 8    | 12.9                          | 12.1 | 12.0 |
| 12     | <i>E. coli</i>              | 8           | 4    | 4    | 18.4                          | 17.5 | 15.5 |
| 13     | <i>E. coli</i>              | 32          | 16   | 16   | 17.0                          | 16.9 | 16.6 |
| 14     | <i>E. coli</i>              | 64          | 32   | 32   | 8.9                           | 9.0  | 8.2  |
| 15     | <i>E. coli</i>              | 256         | 256  | 256  | 6.0                           | 6.0  | 6.5  |
| 16     | <i>K. pneumoniae</i>        | 32          | 16   | 32   | 8.8                           | 8.8  | 8.5  |
| 17     | <i>K. pneumoniae</i>        | 128         | 128  | 128  | 6.0                           | 6.0  | 6.0  |
| 18     | <i>K. pneumoniae</i>        | 32          | 16   | 32   | 9.4                           | 9.4  | 9.5  |
| 19     | <i>K. pneumoniae</i>        | 64          | 32   | 64   | 9.8                           | 9.5  | 7.4  |
| 20     | <i>K. pneumoniae</i>        | 64          | 16   | 64   | 10.8                          | 10.3 | 8.1  |
| 21     | <i>K. pneumoniae</i>        | 128         | 64   | 128  | 6.0                           | 6.0  | 6.0  |
| 22     | <i>K. oxytoca</i>           | 4           | 8    | 8    | 15.1                          | 14.9 | 13.8 |
| 23     | <i>Ent. cloacae</i>         | 32          | 16   | 32   | 12.9                          | 11.8 | 15.4 |
| MEAN   |                             | 40.6        | 28.0 | 37.0 | 13.2                          | 12.9 | 12.4 |

Legend: PP – pure powder, T1 – tablet 1, T2 – tablet 2
